# Supplementary material for: To improve the efficiency of thermally activated delayed fluorescence OLEDs by controlling the horizontal orientation through optimizing stereoscopic and linear structures of indolocarbazole isomers
Source: Royal Society of Chemistry journal article supplement (doi:10.1039/c8tc01419a), 2018-01-01
Supplement: c8tc01419a1.pdf [file c8tc01419a1.pdf]

## Supporting Information

### **To improve efficiency of thermally activated delayed fluorescence OLEDs by controlling the horizontal orientation through optimizing stereoscopic and linear structures of indolocarbazole isomers**

Songpo Xiang,<sup>a</sup> Xialei Lv,<sup>a</sup> Shuaiqiang Sun,<sup>a</sup> Qing Zhang,<sup>a</sup> Zhi Huang,<sup>a</sup> Runda Guo,<sup>a</sup>

Honggang Gu,<sup>b</sup> Shiyuan Liu,<sup>b</sup> Lei Wang<sup>\*a</sup>

<sup>a</sup> Wuhan National Laboratory for Optoelectronics, Huazhong University of Science  
and Technology, Wuhan, 430074, P. R. China

<sup>b</sup> State Key Laboratory of Digital Manufacturing Equipment and Technology,  
Huazhong University of Science and Technology, Wuhan 430074, China.

\*Email: [wanglei@mail.hust.edu.cn](mailto:wanglei@mail.hust.edu.cn)

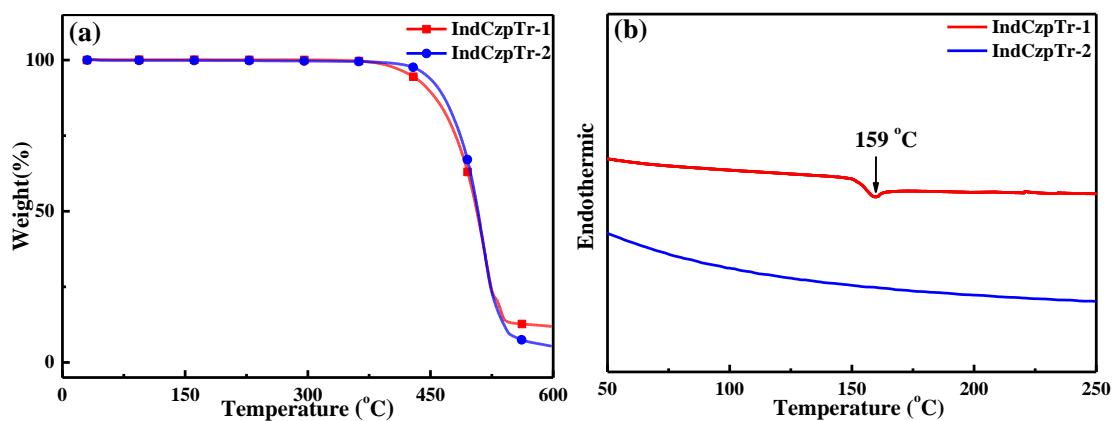

**Fig. S1.** a) TGA thermograms and b) DSC curves of **IndCzpTr-1** and **IndCzpTr-2**.

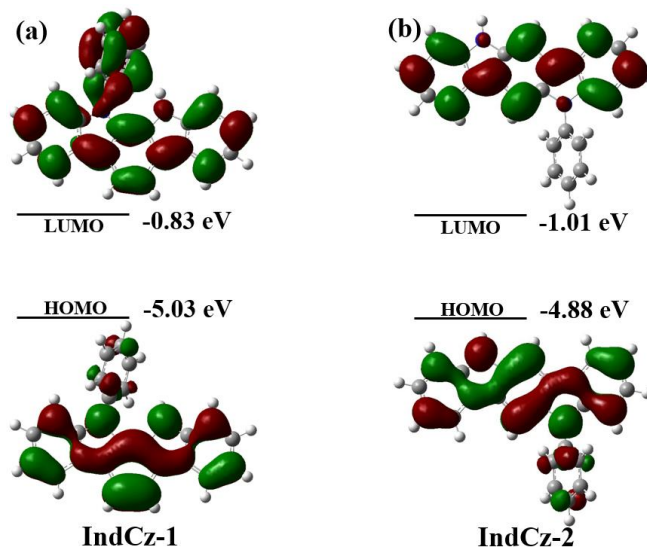

**Fig. S2.** The HOMO and LUMO distribution of a) **IndCz-1** and b) **IndCz-2**, and the calculated energy levels.

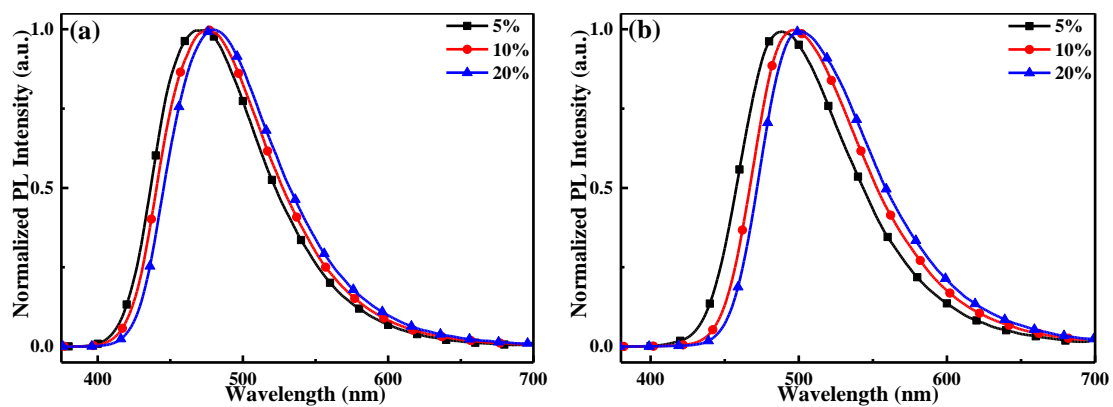

**Fig. S3.** PL spectra of a) **IndCzpTr-1** and b) **IndCzpTr-2** at different concentrations in doped films.

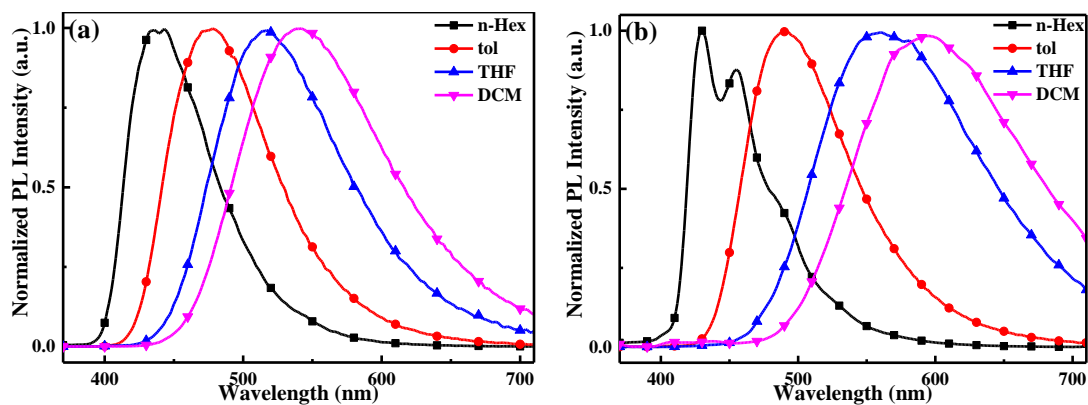

Fig. S4. Solvatochromic of a) **IndCzpTr-1** and b) **IndCzpTr-2** in different solvents.

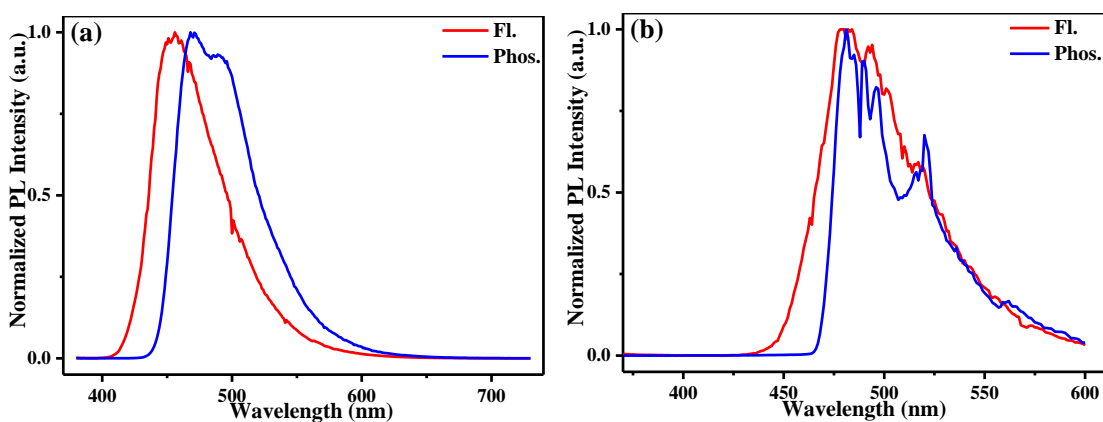

Fig. S5. Low temperature fluorescence and phosphorescence spectra of a) **IndCzpTr-1** and b) **IndCzpTr-2** at 77 K.

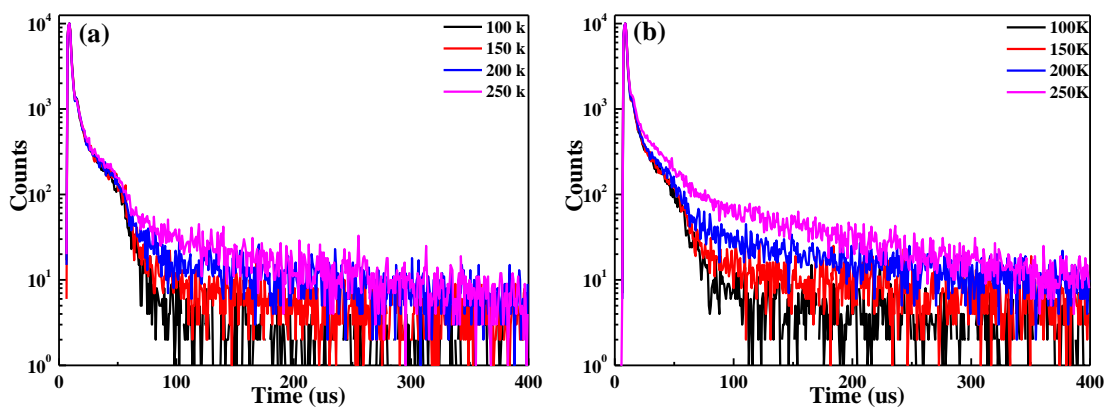

Fig. S6. Temperature-dependence of the transient PL characteristics for a) **IndCzpTr-1** and b) **IndCzpTr-2** in doped films.

**Table S1.** Optical constants of **IndCzpTr-1** and **IndCzpTr-2**.

| Compound          | $\tau_p^a$<br>(ns) | $\tau_d^a$<br>( $\mu$ s) | $\Phi_p^b$<br>(%) | $\Phi_d^b$<br>(%) | $\Phi^c$<br>(%) | $k_{RISC}$<br>( $10^4 s^{-1}$ ) | $k_F$<br>( $10^7 s^{-1}$ ) | $k_{ISC}$<br>( $10^7 s^{-1}$ ) | $k_{TADF}$<br>( $10^4 s^{-1}$ ) |
|-------------------|--------------------|--------------------------|-------------------|-------------------|-----------------|---------------------------------|----------------------------|--------------------------------|---------------------------------|
| <b>IndCzpTr-1</b> | 11.09              | 25.48                    | 73.9              | 4.7               | 78.6            | 3.29                            | 6.66                       | 0.54                           | 3.29                            |
| <b>IndCzpTr-2</b> | 8.83               | 34.31                    | 66.2              | 5.7               | 71.9            | 2.15                            | 7.50                       | 0.90                           | 2.13                            |

<sup>a</sup>  $\tau_p$  (the prompt lifetime) and  $\tau_d$  (the delayed lifetime) were obtained from transient PL decay of doped films. <sup>b</sup>  $\Phi_p$  (the prompt PLQY) and  $\Phi_d$  (the delayed PLQY) were estimated according to the prompt and delayed proportions in transient decay curves. <sup>c</sup> Absolute PLQY of doped films measured with integrating sphere.

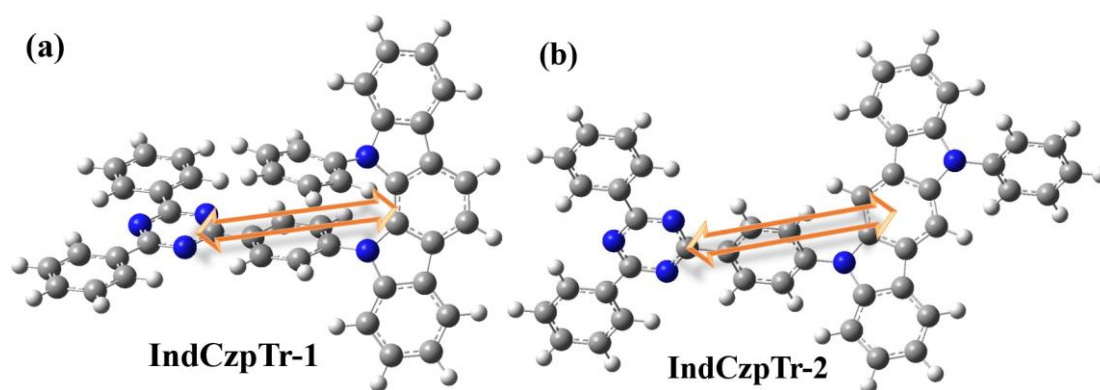

**Fig. S7.** The direction of the calculated transition dipole moment (as indicated by the colored arrow) of a) **IndCzpTr-1** and b) **IndCzpTr-2**.

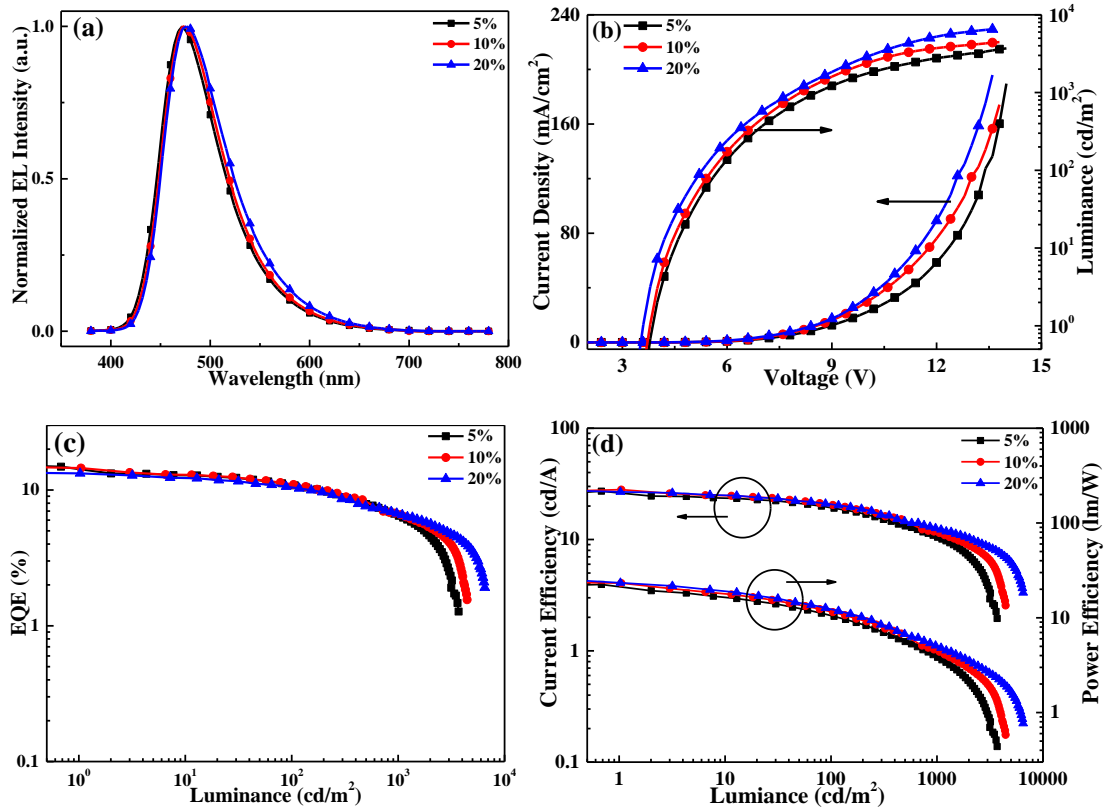

**Fig. S8.** a) EL spectra at 100 cd/m<sup>2</sup>, b) current density–voltage–luminance (J–V–L) characteristics, c) EQE–luminance characteristics, and d) CE–luminance characteristics and PE–luminance characteristics for device of **IndCzpTr-1** with different doped concentrations.

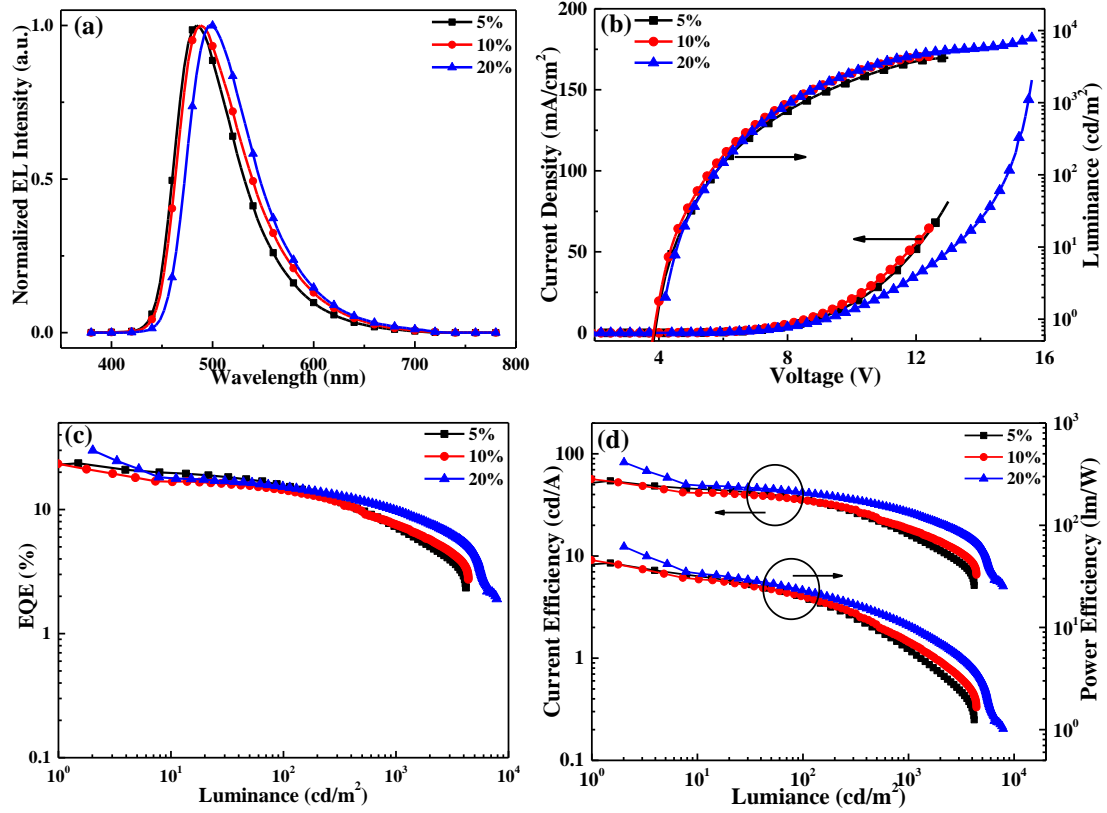

**Fig. S9.** a) EL spectra at 100 cd/m<sup>2</sup>, b) current density–voltage–luminance (J–V–L) characteristics, c) EQE–luminance characteristics, and d) CE–luminance characteristics and PE–luminance characteristics for device of **IndCzpTr-2** with different doped concentrations.

**Table S2.** EL performance of representative OLEDs with different doped concentrations of **IndCzpTr-1** and **IndCzpTr-2** devices.

| EML                               | concentration | V <sub>on</sub> <sup>a</sup> (V) | L <sub>max</sub> <sup>b</sup> (cd m <sup>-2</sup> ) | EQE <sub>max</sub> <sup>c</sup> (%) | CE <sub>max</sub> <sup>c</sup> (cd A <sup>-1</sup> ) | PE <sub>max</sub> <sup>c</sup> (lm W <sup>-1</sup> ) | CIE <sub>(x,y)</sub> | λ <sub>EL</sub> <sup>d</sup> (nm) |
|-----------------------------------|---------------|----------------------------------|-----------------------------------------------------|-------------------------------------|------------------------------------------------------|------------------------------------------------------|----------------------|-----------------------------------|
| <b>mCBP:</b><br><b>IndCzpTr-1</b> | 5%            | 3.9                              | 3701                                                | 14.9                                | 27.2                                                 | 22.4                                                 | (0.17,0.25)          | 472                               |
|                                   | 10%           | 3.8                              | 4452                                                | 14.5                                | 28.1                                                 | 23.2                                                 | (0.17,0.27)          | 472                               |
|                                   | 20%           | 3.6                              | 6520                                                | 13.3                                | 26.8                                                 | 23.4                                                 | (0.18,0.29)          | 476                               |
| <b>mCBP:</b><br><b>IndCzpTr-2</b> | 5%            | 3.9                              | 4185                                                | 23.6                                | 54.3                                                 | 42.7                                                 | (0.19,0.38)          | 484                               |
|                                   | 10%           | 3.9                              | 4396                                                | 24.2                                | 56.7                                                 | 46.3                                                 | (0.21,0.42)          | 488                               |
|                                   | 20%           | 4.0                              | 7876                                                | 30.0                                | 82.6                                                 | 61.8                                                 | (0.23,0.50)          | 496                               |

<sup>a</sup> The maximum luminance. <sup>b</sup> operating voltages for onset. <sup>c</sup> the maximum efficiencies of EQE (%), CE (cd A<sup>-1</sup>) and PE (lm W<sup>-1</sup>). <sup>d</sup> EL peak wavelength.

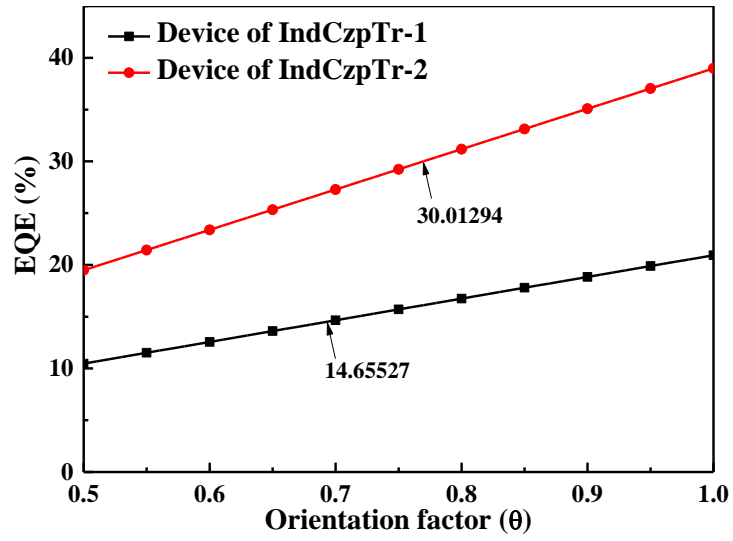

Fig. S10. Calculated results of maximum achievable EQEs as orientation factor.

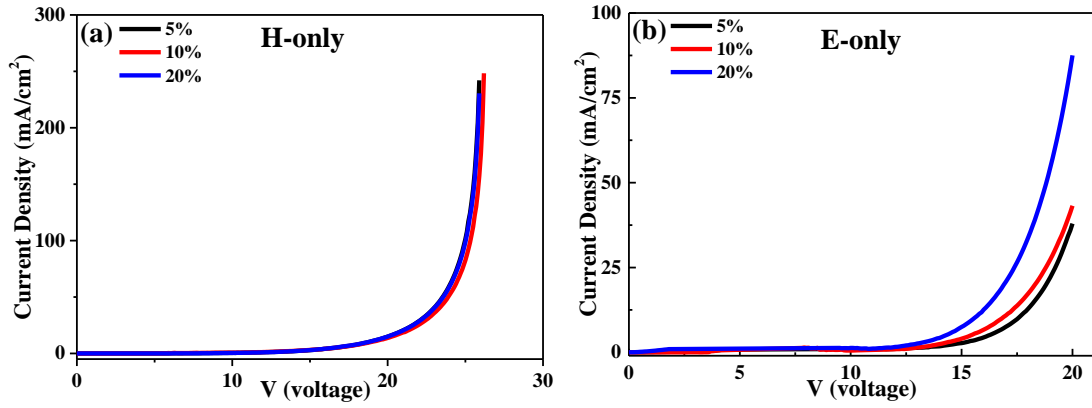

Fig. S11. Current density-voltage characteristics of a) hole-only and b) electron-only devices with different concentrations for **IndCzpTr-1**.

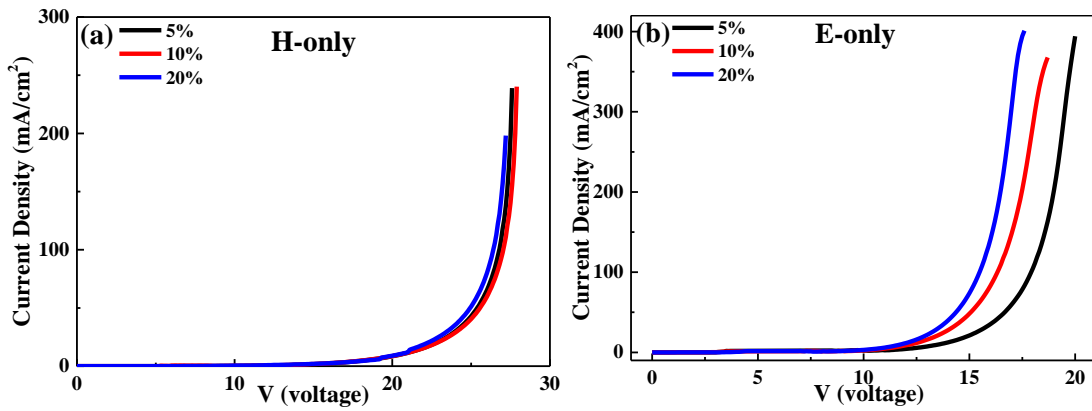

Fig. S12. Current density-voltage characteristics of a) hole-only and b) electron-only devices with different concentrations for **IndCzpTr-2**.
